14 Running title: Genetic analysis of *Drosophila* mei-MCMs  
15 Five key words or phrases: *Drosophila*, meiotic recombination, meiosis, crossover, mei-MCM  
16 Corresponding author: CB #3280, 303 Fordham Hall, Curriculum of Genetics and Molecular  
17 Biology, University of North Carolina, Chapel Hill, NC 27599-3280.  
18 E-mail: [hatkevic@email.unc.edu](mailto:hatkevic@email.unc.edu)

## 19 **Abstract**

20 Crossover formation as a result of meiotic recombination is vital for proper segregation  
21 of homologous chromosomes at the end of meiosis I. In most organisms, crossovers are  
22 generated through two crossover pathways: Class I and Class II. Meiosis-specific protein  
23 complexes ensure accurate crossover placement and formation by promoting and inhibiting the  
24 formation of crossovers in both crossover pathways. In *Drosophila*, Class I crossovers are  
25 promoted and Class II crossovers are prevented by a complex that contains MCM  
26 (mini-chromosome maintenance) and MCM-like proteins, REC (ortholog of Mcm8), MEI-217, and  
27 MEI-218, collectively called the mei-MCM complex. However, little is known about how the  
28 mei-MCMs function within the Class I and II crossover pathways. In this study, we perform  
29 genetic analysis to understand how specific regions and motifs of REC and MEI-218 contribute to  
30 crossover formation and distribution. We see that while the N-terminus of MEI-218 is  
31 dispensable for crossover formation, REC's conserved AAA ATPase motifs exhibit differential  
32 requirements for Class I and Class II crossover formation. REC-dependent ATP hydrolysis, but not  
33 ATP binding, is required for promoting the formation of Class I, MEI-9 dependent crossovers.  
34 Conversely, the ability for REC to both bind and hydrolyze ATP is required for REC's Class II  
35 anti-crossover role, yet to varying degrees, suggesting that REC forms multiple complexes that

36 require different REC-dependent ATP binding functions. These results provide genetic insight  
37 into the mechanism in which mei-MCMs promote Class I crossovers and inhibit Class II crossovers.

## 38 **Introduction**

39 The mini-chromosome maintenance (MCM) protein family was discovered based on its  
40 essential role in DNA replication (Maine and Sinha 1984) and are structurally defined by a  
41 conserved amino-terminal domain and a carboxy-terminal AAA+ ATPase domain (reviewed in  
42 (Bell and Botchan 2013)). While the MCM 2-7 proteins interact to form an indispensable  
43 replicative helicase that is essential in all eukaryotes, MCMs 8-9 function outside of replication,  
44 are not essential for cell viability, and have been lost in many taxa (reviewed in (Forsburg 2004)).  
45 Although Mcm8 and Mcm9 can complex to function in somatic homologous recombination repair  
46 (Lee et al. 2015; Nishimura et al. 2012), Mcm8 also functions independently of Mcm9, particularly  
47 in meiosis (Kohl, Jones, and Sekelsky 2012; Lutzmann et al. 2012; Blanton et al. 2005).

48 Meiosis is a specific type of cell division that reduces a diploid progenitor germ cell into  
49 four haploid gametes through two successive rounds of division. Accurate reduction of the  
50 genome at the end of meiosis I requires crossover formation between homologous chromosomes  
51 during meiotic recombination. Meiotic recombination is initiated by the formation of multiple  
52 double-strand breaks (DSBs); the majority of meiotic DSBs are repaired as noncrossovers, while  
53 a selected subset are repaired as crossovers between homologs (reviewed in (Lake and Hawley  
54 2012)).

55 In meiosis, there are two distinct crossover pathways: Class I and Class II. First defined in  
56 budding yeast (De los Santos et al. 2003), Class I and Class II crossovers exist in most sexually  
57 reproducing organisms, and the extent to which crossover pathway is used varies among

58 organisms (Hollingsworth and Brill 2004). Both crossover pathways generate  
59 segregation-competent crossovers (Hatkevich et al. 2017); however, these pathways differ in key  
60 factors, such as the use of the complex Msh4/5. Only Class I crossovers are dependent upon the  
61 complex Msh4/5 (Zalevsky et al. 1999; De los Santos et al. 2003). Biochemical studies show that  
62 Msh4/5 stabilize recombination intermediates (Snowden et al. 2004), resulting in further  
63 processing and eventual crossover formation by meiosis-specific nucleases (Zakharyevich et al.  
64 2012; De Muyt et al. 2012). Interestingly, Msh4 and Msh5 are absent from *Drosophila*. Instead,  
65 it is hypothesized that *Drosophila* utilizes a complex composed of MCM or MCM-like proteins,  
66 called the mei-MCM complex, to replace the function of Msh4/5 (Kohl, Jones, and Sekelsky 2012).

67         Currently, there are three recognized mei-MCM proteins: REC (the *Drosophila* ortholog of  
68 Mcm8 (Blanton et al. 2005)), MEI-217, and MEI-218. The mei-MCMs aid in DSB repair to ensure  
69 accurate meiotic crossover formation through promoting Class I crossovers. In *Drosophila*, most  
70 – if not all – crossovers are generated through the Class I pathway, with at least 90% of crossovers  
71 being dependent on both the mei-MCMs (Baker and Carpenter 1972a) and the putative catalytic  
72 unit of the Class I meiotic resolvase MEI-9 (Radford et al. 2005; Sekelsky et al. 1995; Yildiz et al.  
73 2002, 2004; Radford et al. 2007).

74         While most crossovers are generated through the Class I pathway in wild-type *Drosophila*,  
75 crossovers are generated exclusively through the Class II pathway in *Blm* mutants (Hatkevich et  
76 al. 2017). *Blm*, or Bloom syndrome helicase, is a member of the conserved RecQ helicase family  
77 (Ellis et al. 1995), and *Blm* exhibits vital functions in both meiotic and somatic DSB repair  
78 (reviewed in (Hatkevich and Sekelsky 2017)). Interestingly, *Blm* and the mei-MCMs genetically  
79 interact; in *Blm* mutants, crossovers are reduced by 30% but in a *Blm rec* double mutant,

80 crossovers are significantly increased as compared to wild-type (Kohl, Jones, and Sekelsky 2012).  
81 This suggests that the mei-MCMs may also function to inhibit crossovers within the Class II  
82 pathway, in addition to their role promoting crossovers in the Class I pathway.

83         Among the known mei-MCMs, REC is the only bona fide MCM protein. REC harbors the  
84 conserved MCM N-terminus and the AAA+ ATPase C-terminus (Figure 1A). MEI-217, however,  
85 harbors only the conserved amino MCM domain, while MEI-218 possesses a disordered basic  
86 N-terminus (amino acids 1-500 (Brand et al. 2018)), a partially conserved central acidic region  
87 (amino acids 500-800 (Brand et al. 2018)) and a highly-conserved C-terminal ATPase-like region  
88 (amino acids 850-1116 (Kohl, Jones, and Sekelsky 2012)). The function of the disordered MEI-218  
89 N-terminus is unknown, but gene swap studies suggest that the N-terminus, along with the  
90 central region, may contribute to differences in the recombination landscape among *Drosophila*  
91 species (Brand et al. 2018).

92         MEI-217 and MEI-218 together resemble one full MCM protein (Figure 1A). It appears  
93 that *mei-217* and *mei-218* have evolved from one ancestral gene, being that both genes are  
94 expressed from one bicistronic transcript (Liu et al. 2000). The mammalian ortholog of *mei-217*  
95 and *mei-218* is *Mcmcdc2* (Mcm-domain containing protein 2) which expresses one protein with a  
96 conserved MCM N-terminus and AAA+ ATPase C-terminus. Mice mutant for *Mcmcdc2* exhibit  
97 sterility due to an inability to repair meiotic DSBs, indicating that MCMDC2 functions in meiotic  
98 DSB repair, similar to the roles of mei-MCMs (Finsterbusch et al. 2016; McNairn, Rinaldi, and  
99 Schimenti 2017).

100         The C-terminal AAA+ catalytic domain of MCM proteins contain distinct signature  
101 sequences, including the Walker A and Walker B motifs that bind and hydrolyze ATP, respectively

102 (Iyer et al. 2004). Within the mei-MCMs, only REC contains a predicted catalytically active AAA+  
103 ATPase domain, as catalytic residues within the Walker A and B motifs in MEI-218 and its ortholog  
104 MCMDC2 are not conserved (Kohl, Jones, and Sekelsky 2012; Finsterbusch et al. 2016; McNairn,  
105 Rinaldi, and Schimenti 2017) (Figure 1B). REC (and all Mcm8 orthologs), however, has diverged  
106 from other MCMs, as it does not contain a conserved arginine finger, a *trans* acting AAA+ ATPase  
107 motif that is present in canonical MCMs (Blanton et al. 2005; Forsburg 2004). This suggests that  
108 the mei-MCM complex may contain an additional, as-yet-unidentified, MCM protein that  
109 provides the arginine finger (Kohl, Jones, and Sekelsky 2012) or that REC may utilize a modified  
110 mechanism to hydrolyze ATP.

111         The mei-MCMs are a highly divergent class of proteins and appear to have evolved the  
112 function to ensure accurate recombination in *Drosophila* through promoting Class I crossovers  
113 and inhibiting Class II crossovers (Kohl, Jones, and Sekelsky 2012). While the mei-MCMs form a  
114 complex together, little is known about how individual mei-MCMs contribute to Class I and II  
115 crossover regulation. Here, we investigate specific requirements of two mei-MCMs, MEI-218 and  
116 REC, to understand how this protein class contributes to recombination in *Drosophila*  
117 *melanogaster*. We find, surprisingly, that the N-terminus of MEI-218 is dispensable for crossover  
118 formation and general crossover distribution. However, our study shows that REC ATP binding  
119 and hydrolysis are differentially required within the Class I and II crossover pathways. The ability  
120 for REC to hydrolyze ATP, but not bind ATP, is required for Class I, MEI-9 dependent crossovers.  
121 Lastly, we find that REC's ability to REC ATP binding and hydrolysis are required to inhibit Class II  
122 crossovers.

## 123 **Materials and Methods**

124 ***Drosophila* stocks.** Flies were maintained on standard medium at 25°C. Assays examined  
125 heteroallelic and homozygous mutant flies that have been previously described, including *mei-9<sup>a</sup>*  
126 (Baker and Carpenter 1972b), *mei-218<sup>1</sup>* and *mei-218<sup>6</sup>* (Baker and Carpenter 1972b; McKim,  
127 Dahmus, and Hawley 1996), *Blm<sup>N1</sup>* and *Blm<sup>D2</sup>* (McVey et al. 2007), *rec<sup>1</sup>* and *rec<sup>2</sup>* (Grell 1984;  
128 Matsubayashi and Yamamoto 2003). The maternal effect lethality in *Blm<sup>N1/D2</sup>* mutants was  
129 overcome by the *UAS::GAL4* rescue system previously described (Kohl, Jones, and Sekelsky 2012).

130 **Generating *mei-218* transgenic alleles.** The transgenes for *mei-218<sup>ΔN</sup>* and *mei-218<sup>FL</sup>* were  
131 created by cloning cDNA for *mei-218*. Cloning for full length *mei-218* included amino acids  
132 1-1186, and the *mei-218<sup>ΔN</sup>* transgene included amino acid positions 527-1186. These transgenes  
133 were inserted into *p{attBUASpW}* (AddGene) by Gateway cloning. This vector was injected using  
134 PhiC31 transformation (Best Gene Inc.) into the 2A genomic location.

135 **Generating *rec<sup>KA</sup>* and *rec<sup>DA</sup>* mutants.** pU6-BbsI-chiRNA plasmid (Addgene) was used to insert  
136 chiRNA oligos after *BbsI* digestion. Oligo sequence for *rec<sup>KA</sup>*: 5'F  
137 CTTCGCCGAGAAGGGATAGTAAAC 3'; oligo sequence for *rec<sup>DA</sup>*: 5'F  
138 CTTCGTTGCAGTGCCTACAATCAG 3'. Resulting plasmids were co-injected with repair vector.  
139 Repair vectors were generated using pBlueScript plasmid and repair oligo G-blocks (IDT) after  
140 *NotI* and *SacII* digestion. Oligo sequences for *rec<sup>KA</sup>* and *rec<sup>DA</sup>* repair vectors are available upon  
141 request. Transformant males were screened through restriction digest and were crossed to  
142 *TM3/TM6B* females (Bloomington Stock Center) to generate stocks.

143 **Nondisjunction assay.** X-chromosome nondisjunction (NDJ) was assayed by mating virgin  
144 females with mutant background of interest to  $y\ cv\ v\ f / T(1:Y)B^S$  males. Progeny were scored for  
145 viable exceptional progeny, which are  $XXY$  females with Bar eyes and  $XO$  males with  $Bar^+$  eyes  
146 and the phenotypes from  $y\ cv\ v\ f$  chromosome. Total (adjusted) represents the total with inviable  
147 exceptional progeny accounted for. NDJ rates and statistical comparisons were done as in Zeng  
148 et al. 2010.

149 **Crossover distribution assay.** Crossover distribution on chromosome  $2L$  was scored by crossing  
150 virgin  $net\ dpp^{d-ho}\ dp\ b\ pr\ cn / +$  female flies with mutant background of interest to  $net\ dpp^{d-ho}\ dp$   
151  $b\ pr\ cn$  homozygous males. All progeny were scored for parental and recombinant phenotypes.  
152 Crossover numbers in flies are shown as cM where  $cM = (\text{number of crossovers} / \text{total number}$   
153  $\text{of flies}) * 100$ . Chi-squared tests with Bonferroni correction were performed for each interval or  
154 for all intervals combined to determine statistical significance between interested backgrounds.  
155 Crossover distribution is represented as cM/Mb where Mb is length of the interval without  
156 transposable elements (TEs) because crossovers rarely occur within TEs (Miller et al. 2016).

157 **Protein structure and alignment.** Structural domains of proteins were determined by using  
158 PHYRE 2. All of the MCM regions identified correspond to the protein data bank ID #c2vl6C and  
159 the AAA ATPase domains identified correspond to protein data bank ID #d1g8pa. Alignment of  
160 the Walker A and Walker B motifs (Kohl, Jones, and Sekelsky 2012) was done using MEGA 5 and  
161 aligned with the ClustalW program. Identical and conserved residues are shaded in black.  
162 Conserved residues are based on groups of amino acids with similar chemical properties  
163 (nonpolar, polar, acidic, and basic).



164 **Data availability.** All data necessary for confirming the conclusions in this paper are included in  
165 this article and in supplemental figures and tables. *Drosophila* stocks and plasmids described in  
166 this study are available upon request. We have uploaded Supplemental Material to Figshare.  
167 Figure S1 illustrates distribution of Msh4, Msh5, Mcm8, Mcm9, MEI-217, and MEI-218 in Diptera.  
168 Figure S2 illustrates the structure of MEI-217 and MEI-218 in Diptera. Figure S3 shows sequence  
169 alignment of MEI-218. Figure S4 details the cross scheme of *mei-218* over expression. Figure S5  
170 illustrates the crossover distribution of *WT* and *mei-218<sup>FL</sup>*. Table S1 includes analysis of genetic  
171 interval differences between *WT* and *mei-218<sup>FL</sup>*. Table S2 includes analysis of genetic interval  
172 differences between *mei-218<sup>FL</sup>* and *mei-218<sup>ΔN</sup>*. Table S3 includes complete data set for calculating  
173 nondisjunction of *WT*, *rec<sup>-/+</sup>*, and *rec<sup>DA/+</sup>*. Table S4 includes all data sets for meiotic crossovers for  
174 all genotypes discussed.

175

## 176 **Results and Discussion**

### 177 *Origins of the mei-MCM Complex*

178 The three known mei-MCM proteins are REC, MEI-217, and MEI-218. Kohl *et al.*  
179 demonstrated that REC, the ortholog of Mcm8, evolved by positive selection in the lineage  
180 leading to Schizophora (true flies), based on an analysis that included sequences from 12 species  
181 of *Drosophila* and from the tsetse fly *Glossina morsitans*. These same species lacked orthologs  
182 of Msh4, Msh5, and Mcm9. There are now genome or transcriptome sequences for more than  
183 50 additional Schizophora species, all of which are like those previously described in lacking  
184 Msh4, Msh5, and Mcm9 (Figure S1). There are also partial transcriptome sequences for several

185 species in the sister taxon Aschiza. We do find orthologs of Msh4, Msh5, or Mcm9 among the  
186 available sequence, suggesting that the mei-MCM complex evolved as early as the split between  
187 the Dipteran sub-orders of Brachycera, which includes Schizophora and Aschiza, and  
188 Nematocera, which includes mosquitoes previously found have orthologs of Msh4, Msh5, and  
189 Mcm9 (Kohl, Figure S1). The one other Brachycera taxon for which transcriptome sequence is  
190 available is the superfamily Asiloidea. Although we do not find orthologs of Msh4 or Msh5 among  
191 the available sequences, we do find clear evidence for Mcm9 orthologs. It will be interesting to  
192 examine these species more thoroughly when additional sequences become available.

193 MEI-217 and MEI-218 are encoded in overlapping open reading frames (ORFs) on a  
194 bicistronic transcript and are apparently derived from a single ancestral protein now called MCM  
195 domain-containing protein 2 (MCMDC2) (McNairn, Rinaldi, and Schimenti 2017; Finsterbusch et  
196 al. 2016). MCMDC2 appears to have arisen early in the Opisthokont (fungi and metazoan) lineage,  
197 as there are apparent orthologs in several species placed in Fungi *incertae sedis*, including at least  
198 the phyla Chytridiomycota, Mucoromycota, and Zoopagomycota, although we find no orthologs  
199 in the Dikarya (higher fungi) subkingdom. Based on available genome and transcriptome  
200 sequences, Mcmdc2 seems to have been lost in numerous lineages, from entire phyla (*e.g.*,  
201 Nematoda) to subfamilies (*e.g.*, Anophelinae; we do not find orthologs in any of the 20 species  
202 of *Anopheles* with sequenced genomes, but orthologs are clearly present in other Culicidae,  
203 including *Aedes* and *Culex*; Figures S1 and S2). The split of Mcmdc2 into MEI-217 and MEI-218 is  
204 seen in all Dipteran species that have these proteins. All Schizophora and Aschiza genomes  
205 appear to encode these proteins in overlapping ORFs (Figure S2), so this configuration has been  
206 maintained for more than 150 million years. In the Nematocera suborder, however, there appear

207 to have been numerous losses of MEI-217/218 (Figure S2). In species that have retained these  
208 proteins, they are encoded on bicistronic transcripts, but the ORFs are separated by short  
209 non-coding regions (Figure S2B). In all other taxa, including Lepidoptera, which is the most closely  
210 related order to Diptera, there is a single Mcmdc2 polypeptide that has the canonical domain  
211 structure of replicative MCM proteins.

212

### 213 *MEI-218 N-terminus is dispensable for crossover formation*

214 MEI-218 harbors three distinct regions: an N-terminal tail (amino acids 1-500 (Brand et al.  
215 2018)), a central acidic region (amino acids 500-800 (Brand et al. 2018)) and C-terminal ATPase  
216 region (amino acids 850-1116 (Kohl, Jones, and Sekelsky 2012)) (Figure 1A). While the C-terminus  
217 of MEI-218 is similar to MCM AAA+ ATPase domain, the N-terminal and middle regions are  
218 predicted to be disordered (Kohl, Jones, and Sekelsky 2012) and are poorly conserved among  
219 *Drosophila* (Figure S3). Regardless the lack of conservation, results obtained during gene swap  
220 experiments suggest that the N-terminal tail and central region regulate crossover number and  
221 distribution within *Drosophila* species (Brand et al. 2018). To investigate functions of these  
222 regions, we created a transgene that expresses a truncated form of MEI-218 that eliminates the  
223 first 526 amino acids of the N-terminus (*mei-218<sup>ΔN</sup>*). We retained the middle region because of  
224 the presence of short sequences conserved through *Drosophila* (Figure S3). For a positive control  
225 we created a full-length MEI-218 construct (*mei-218<sup>FL</sup>*) (Figure 2A). Using the *UAS/GAL4* system  
226 (Duffy 2002), we expressed both constructs in *mei-218* null mutants using the germline-specific  
227 *nanos* promoter and measured crossovers along five adjacent intervals that span most of 2L and  
228 part of 2R (Figure S4; for simplicity, we refer to this chromosomal region as 2L.)

229 In wild-type females, the genetic length of 2L is 45.8 cM (Hatkevich et al. 2017) (Figure  
230 2B), whereas *mei-218* mutants exhibit a severe decrease in crossovers, resulting in a genetic  
231 length of 2.92 cM (Kohl, Jones, and Sekelsky 2012). Expression of *mei-218<sup>FL</sup>* in *mei-218* mutants  
232 (*mei-218; mei-218<sup>FL</sup>*) fully rescues the crossover defect, exhibiting a genetic length of 54.1 cM  
233 (Table S1, Figure S5). The modest increase in crossovers in *mei-218; mei-218<sup>FL</sup>* may be due to  
234 overexpression of *mei-218<sup>FL</sup>* as a result of the *UAS/GAL4* transgenic system. Unexpectedly,  
235 expressing MEI-218 without the N-terminus is not significantly different from full length MEI-218  
236 (55.9 cM, Figure 2B).

237 When *Drosophila mauritiana* MEI-217/MEI-218 is expressed in *Drosophila melanogaster*,  
238 crossovers are increased proximally and distally, resulting in an overall change in crossover  
239 distribution (Brand et al. 2018). To determine whether the N-terminus of *Drosophila*  
240 *melanogaster* MEI-218 functions in regulating crossover distribution, we examined crossover  
241 distribution in *mei-218; mei-218<sup>FL</sup>* and *mei-218; mei-218<sup>ΔN</sup>* (Figure 2C). Overall, crossover  
242 distributions are similar, with both genotypes exhibiting a strong inhibition of crossovers near  
243 the centromere (referred to as the centromere effect (Beadle 1932)) and the majority of the  
244 crossovers placed in the medial-distal portion of 2L.

245 We conclude that the N-terminal tail of MEI-218 is dispensable for both crossover  
246 formation and overall distribution. Recently, Brand et al. suggest that the variation among  
247 *Drosophila* MEI-218 N-terminal and middle-acidic regions account for the differences in  
248 recombination rate and patterning between *Drosophila melanogaster* and *Drosophila mauritiana*  
249 (Brand et al. 2018). In light of our results, it appears that the central and C-terminal regions of *D.*  
250 *melanogaster* MEI-218 are sufficient for the recombination landscape in *D. melanogaster*.

251 Regardless, the N-terminus of MEI-218 may function in other capacities; MEI-218 is expressed  
252 moderately highly in *Drosophila* male testes (Thurmond et al. 2018, FB2018\_05) although males  
253 do not experience meiotic recombination. Interestingly, the predominant transcript in males  
254 does not encode MEI-217 (Thurmond et al. 2018, FB2018\_05), the seemingly obligate partner for  
255 MEI-218. From these expression data, we speculate that MEI-218 may function outside of the  
256 mei-MCM complex in males, with its N-terminus being important for this unknown function.

257

258 *REC* ATPase activity is required for crossover formation

259 The mei-MCM complex is hypothesized to functionally replace the heterodimer Msh4/5  
260 in *Drosophila* (Kohl, Jones, and Sekelsky 2012). Msh4 and 5 are part of the Walker A/B family of  
261 ATPases (Walker et al. 1982). Both proteins exhibit ATPase activity *in vitro* (Snowden et al. 2004),  
262 and mutations disrupting ATP hydrolysis in Msh4 and Msh5 confer null phenotypes *in vivo*  
263 (Pochart, Woltering, and Hollingsworth 1997). Correspondingly, it is unknown if the mei-MCM  
264 complex utilizes ATPase activity for its function *in vivo*.

265 Of the three known subunits, REC is the only mei-MCM that has well-conserved Walker A  
266 and B motifs, suggesting that REC has ATP binding and hydrolysis activity, respectively (Kohl,  
267 Jones, and Sekelsky 2012). To determine the importance of ATP-binding and hydrolysis motifs for  
268 the *in vivo* function of the mei-MCM complex, we introduced mutations within the Walker A and  
269 B motifs of REC using CRISPR/Cas9 (Figure 3A). In the Walker A mutant, we substituted the  
270 conserved lysine residue to an alanine (*rec<sup>KA</sup>*), a mutation predicted to prohibit REC from binding  
271 to ATP. In the Walker B mutant, we substituted the conserved aspartic acid for an alanine (*rec<sup>DA</sup>*),

272 a mutation predicted to permit REC to bind to ATP but prohibits REC from hydrolyzing ATP. We  
273 then assayed these mutants for crossover formation along 2L (Figure 3B).

274 Surprisingly *rec<sup>KA</sup>* ATP binding mutants exhibit a genetic length of 44.9 cM, which is not  
275 statistically different from wild-type, while *rec<sup>DA</sup>* ATP hydrolysis mutants exhibit a severe  
276 reduction of crossovers, with a genetic length of 1.6 cM. Because the genetic length of *rec<sup>DA</sup>* is  
277 significantly lower than *rec* null mutants, we hypothesized that *rec<sup>DA</sup>* acts as a dominant negative.  
278 To test this, we examined *X* chromosome nondisjunction (NDJ) of *rec<sup>DA</sup>* heterozygous mutants  
279 (*rec<sup>DA</sup>/rec<sup>+</sup>*) (Figure 3C). While both wild-type and *rec* null heterozygotes exhibit near 0% *X* NDJ,  
280 *rec<sup>DA</sup>/rec<sup>+</sup>* mutants have a significantly higher NDJ rate of 1.4%, showing that *rec<sup>DA</sup>* is weakly  
281 antimorphic. In light of these results, we propose that the mei-MCM complex binds to  
282 recombination sites independent of REC binding to ATP, and that REC-dependent ATP hydrolysis  
283 is required for the removal of the mei-MCM complex from these sites.

284 We conclude that REC-dependent ATPase activity is needed for crossover formation.  
285 Specifically, REC's ATP hydrolysis motif (Walker B) is required for ATPase activity, but REC's ATP  
286 binding motif (Walker A) is apparently dispensable for crossover formation. The disparate  
287 requirements for REC ATP binding and hydrolysis echo studies of Rad51 paralogs, which form  
288 multi-protein complexes and contain Walker A and B motifs (Wiese et al. 2006; Wu et al. 2004,  
289 2005). It is proposed that the ATPase activity in human Rad51 paralogs occur in *trans* between  
290 adjacent subunits, with each subunit showing differential ATP binding and hydrolysis  
291 requirements for ATPase activity within the complex (Wiese et al. 2006; Wu et al. 2004, 2005).  
292 Additionally, in canonical MCM proteins, mutations within the different subunits' Walker A and  
293 B motifs have varying effects on ATPase activity (Gómez, Catlett, and Forsburg 2002). Because

294 neither MEI-217 nor MEI-218 possess a conserved ATPase domain (Figure 1B) (Kohl, Jones, and  
295 Sekelsky 2012), we propose that ATPase activity of the mei-MCM requires REC for ATP hydrolysis  
296 and an unknown mei-MCM protein for ATP binding (Figure 3D). Further studies are needed to  
297 uncover this hypothesized novel mei-MCM.

298

299 *REC-dependent ATP hydrolysis is required for MEI-9-dependent crossovers*

300 Next, we examined whether the crossovers generated in *rec<sup>KA</sup>* and *rec<sup>DA</sup>* mutants are  
301 formed by the Class I nuclease complex. In *Drosophila*, the catalytic subunit of the putative Class  
302 I meiosis-specific endonuclease is MEI-9 (Radford et al. 2005; Sekelsky et al. 1995; Yildiz et al.  
303 2002, 2004; Radford et al. 2007; Hatkevich et al. 2017). Accordingly, the 2L genetic length within  
304 a *mei-9* mutant is 2.75 cM (Figure 4), demonstrating that at least 90% of crossovers are  
305 dependent upon MEI-9 resolution. However, *mei-9; rec* double mutants exhibit a genetic length  
306 of 6.38 cM, indicating that in the absence of REC, the resulting crossovers are independent of  
307 MEI-9.

308 Because *rec<sup>KA</sup>* mutants exhibit the same distribution and number of crossovers as  
309 wild-type (Figure 3), we hypothesized that *rec<sup>KA</sup>* crossovers are dependent on MEI-9. To test this,  
310 we examined genetic length across 2L in *mei-9; rec<sup>KA</sup>* double mutants (Figure 4). Mutants for  
311 *mei-9; rec<sup>KA</sup>* exhibit a genetic length of 2.72 cM, which is not significantly different from *mei-9*  
312 single mutants, showing that crossovers in *rec<sup>KA</sup>* are dependent upon MEI-9 nuclease. In contrast,  
313 due to the dominant negative nature of *rec<sup>DA</sup>*, we predicted that crossovers in *rec<sup>DA</sup>* will be  
314 independent of MEI-9, similar to crossovers generated in *rec* null mutants. We observe that  
315 *mei-9; rec<sup>DA</sup>* double mutants exhibit a genetic length of 1.1 cM, which is not significantly different

316 than *rec<sup>DA</sup>* single mutants, demonstrating that crossovers in *rec<sup>DA</sup>* are independent of MEI-9  
317 resolution (Figure 4).

318 From these data, we conclude that MEI-9 generates the crossovers in *rec<sup>KA</sup>* mutants,  
319 whereas mitotic nucleases generate the crossovers formed in *rec<sup>DA</sup>* mutants. These data show  
320 that *rec<sup>KA</sup>* appears to function as wild-type in the Class I pathway, while Class I crossovers are lost  
321 in *rec* null and *rec<sup>DA</sup>* mutants. We suggest that the ability of REC to hydrolyze ATP, but not bind,  
322 is required for the formation of Class I crossovers.

323

324 *REC ATP binding and hydrolysis are required for REC's Class II anti-crossover role*

325 In wild-type *Drosophila*, most or all crossovers are generated through the Class I pathway  
326 (Hatkevich et al. 2017), and these crossovers are dependent upon the mei-MCM complex (Kohl,  
327 Jones, and Sekelsky 2012). However, in *Blm* mutants, crossovers are generated exclusively  
328 through the Class II pathway (Hatkevich et al. 2017). In *Drosophila Blm* mutants, meiotic  
329 crossovers are decreased by 30%, suggesting that the Class II pathway is less efficient at  
330 generating crossovers than the Class I pathway. However, in *Blm rec* double mutants, crossovers  
331 are increased significantly compared to *Blm* single mutants (Kohl, Jones, and Sekelsky 2012),  
332 providing REC with a pro-crossover role in *Blm* mutants. From these results, we propose that REC  
333 – and/or the mei-MCM complex – promotes crossovers in the Class I pathway and prohibits  
334 crossovers in the Class II pathway.

335 To further understand the role of REC in the Class II pathway, we investigated whether  
336 the predicted ATP binding or hydrolysis ability of REC is required for its Class II anti-crossover  
337 function. To do this, we measured the crossovers across 2L in *rec<sup>KA</sup>* and *rec<sup>DA</sup>* in the background



338 of *Blm* mutants. If REC ATP binding or hydrolysis is required for an anti-crossover role in Class II,  
339 then the genetic length of *Blm rec<sup>KA</sup>* or *Blm rec<sup>DA</sup>* double mutants will be similar to that of *Blm rec*  
340 double mutants. Conversely, if REC ATP binding or hydrolysis is not required, then double  
341 mutants will exhibit genetic lengths similar to that of *Blm* single mutants.

342 Interestingly, *Blm rec<sup>KA</sup>* mutants exhibit an intermediate genetic length of 43.3 cM, which  
343 is significantly lower than *Blm rec* mutants but significantly higher than *Blm* single mutant (Figure  
344 5A), suggesting that REC ATP binding has an anti-crossover role at a subset of Class II  
345 recombination sites. Flies mutant for *Blm rec<sup>DA</sup>* have a recombination rate of 53.4 cM, which is  
346 similar to *Blm, rec* double mutants, demonstrating that REC ATP hydrolysis is required for the  
347 inhibition of crossovers at all REC-associated Class II recombination sites.

348 These results show that REC ATP binding is required for REC's anti-crossover role at some  
349 Class II recombination sites, while REC ATP hydrolysis is required for REC's anti-crossover role at  
350 all REC-localized Class II recombination sites. We propose that, within the Class II pathway, REC  
351 forms two types of complexes at Class II recombination sites to prohibit crossover formation  
352 (Figure 5B). Both complexes perform REC-dependent ATP hydrolysis, but only one type of  
353 complex requires REC-dependent ATP binding. We propose that these two REC-containing  
354 complexes, which may or may not require the other mei-MCMs, act together to prohibit Class II  
355 crossover formation at all REC-associated Class II recombination sites.

## 356 **Conclusions**

357 The mei-MCMs are a family of diverged proteins that help to establish the recombination  
358 landscape in *Drosophila melanogaster*. Results obtained in this study have further elucidated  
359 meiotic recombination roles for two mei-MCMs, MEI-218 and REC. While the N-terminus of

360 MEI-218 is dispensable for crossover formation (Figure 2), REC's conserved Walker A and B motifs  
361 exhibit differential requirements for regulating Class I and Class II crossover formation.  
362 REC-dependent ATP hydrolysis, but not ATP binding, is required for promoting the formation  
363 Class I, MEI-9 dependent crossovers (Figures 3 and 4). The weakly antimorphic phenotype of  
364 *rec<sup>DA</sup>* demonstrates that an impaired REC Walker B mutant renders a poisonous complex – a  
365 complex in which we propose cannot be released from recombination sites. Conversely, both the  
366 ability for REC to bind and hydrolyze ATP are required for REC's Class II anti-crossover role, yet to  
367 varying degrees (Figure 5), suggesting that REC forms multiple complexes within the Class II  
368 pathway that exhibit differential REC-dependent ATP binding requirements. Biochemical and  
369 cytological studies are needed to support or refute these hypotheses.

370         Among the many remaining questions regarding the meiotic functions of the mei-MCMs,  
371 one question particularly stands out: does the mei-MCM complex in *Drosophila* truly replace  
372 Msh4/5 within the Class I crossover pathway? In mammalian meiotic recombination, MCMDC2  
373 (a mei-MCM) is loaded early, possibly stabilizing early recombination interactions (Finsterbusch  
374 et al. 2016; McNairn, Rinaldi, and Schimenti 2017). Msh4/5 is loaded after strand invasion,  
375 stabilizing recombination intermediates (reviewed in (Gray and Cohen 2016)), placing this  
376 complex downstream of MCMDC2. Also, in budding yeast, which does not have mei-MCMs,  
377 Msh4/5 stabilizes recombination intermediates; it is unknown if there is a complex in yeast that  
378 stabilizes early recombination interactions prior to strand invasion. We propose that the  
379 *Drosophila* mei-MCMs evolved to retain the function of both MCMDC2 and Msh4/5, such that  
380 the mei-MCMs stabilize early recombination interactions *and* later recombination intermediates

381 to allow maturation of these sites from DSBs to crossovers. Cytological evidence from *Drosophila*  
382 is required to gain further understanding and evidence into this function of the mei-MCMs.

383

#### 384 **Acknowledgements**

385 We thank Juan Carvajal Garcia and Carolyn Turcotte for comments on the manuscript. This work  
386 was supported in part by a grant from the National Institute of General Medical Sciences to J.S.  
387 under award 1R35 GM-118127. K.P.K. was supported in part by NIH grant P20GM103499. T.H.  
388 was supported in part by NIH grants 5T32GM007092 and 1F31AG055157.

389

#### 390 **Figure Legends**

391 **Figure 1. MCM protein structure and alignments.** (A) Structural domains of *Drosophila*  
392 *melanogaster* REC, MEI-217, MEI-218 and *Mus musculus* MCMDC2. Structural domains identified  
393 using PHYRE 2 (Kohl, Jones, and Sekelsky 2012). “MCM domain” corresponds to protein data bank  
394 ID #c2vl6C and the AAA ATPase domains identified correspond to protein data bank ID #d1g8pa.  
395 The X on *Dm* MEI-218 and *Mm* MCMDC2 represents predicted inactive AAA ATPase domains. (B)  
396 Consensus sequence for Walker A motif (Walker et al. 1982), and consensus sequence for Walker  
397 B motif (Forsburg 2004). Identical or conserved amino acids are denoted with black background.

398 **Figure 2. The role of MEI-218 N-terminus in crossover formation and distribution.** (A) Schematic  
399 of transgenes for full length *mei-218* and N-terminal deleted *mei-218*, which is truncated up to  
400 amino acid 527. (B) Map units of WT (Hatkevich et al. 2017), *mei-218* (Kohl, Jones, and Sekelsky

401 2012), *mei-218<sup>FL</sup>* and *mei-218<sup>ΔN</sup>*. Map units represented as centimorgans (cM). Error bars indicate  
402 95% confidence intervals. \*\*\* $P < 0.0001$ ; *n.s.* =  $P > 0.05$ . (C) Crossover distribution (solid lines) of  
403 *mei-218<sup>FL</sup>* and *mei-218<sup>ΔN</sup>* represented as cM/Mb. Mb is measured distance of defined interval,  
404 excluding centromere, pericentromeric heterochromatin and transposable elements. Dotted  
405 lines represent mean crossover density across 2L. Refer to tables S1, S2, and S4 for complete data  
406 sets.

407 **Figure 3. REC ATPase binding and hydrolysis requirements for crossover formation.** (A)  
408 Schematic representation of the mutated residues in *rec<sup>KA</sup>* and *rec<sup>DA</sup>*. (B) Map units of *WT*  
409 (Hatkevich et al. 2017), *rec<sup>1/2</sup>*, *rec<sup>KA</sup>*, and *rec<sup>DA</sup>*. Map units represented as centimorgans (cM). Error  
410 bars show 95% confidence intervals. (C) Percent nondisjunction of *WT*, *rec<sup>1/+</sup>*, and *rec<sup>DA/+</sup>*. (D)  
411 Model of possible complex depicting the functional Walker B motif of REC protein interacting  
412 with a Walker A motif on a potential partner. \*\*\* $P < 0.0001$ . Refer to tables S3 and S4 for  
413 complete data sets.

414 **Figure 4. MEI-9-dependent crossovers in *rec<sup>KA</sup>* and *rec<sup>DA</sup>* mutants.** Map units of *WT* (Hatkevich  
415 et al. 2017), *rec*, *mei-9*, *mei-9;rec*, *rec<sup>KA</sup>*, *mei-9;rec<sup>KA</sup>*, *rec<sup>DA</sup>*, and *mei-9;rec<sup>DA</sup>*. Map units  
416 represented as centimorgans (cM). Error bars show 95% confidence intervals. \*\*\* $P < 0.0001$ ; *n.s.*  
417 = not significant ( $P > 0.05$ ). Refer to table S4 for complete data set.

418 **Figure 5. Requirements of REC ATPase activity in Blm function.** Map units of *WT* (Hatkevich et  
419 al. 2017), *Blm* (Kohl, Jones, and Sekelsky 2012), *rec*, *Blm rec* (Kohl, Jones, and Sekelsky 2012),  
420 *Blm rec<sup>KA</sup>*, and *Blm rec<sup>DA</sup>*. Map units represented as centimorgans (cM). Error bars show 95%  
421 confidence intervals. \*  $P < 0.05$  and \*\*\*  $P < 0.0001$ . Refer to table S4 for complete data set. (B)

422 Model of REC-associated recombination sites (all circles) where filled in circles represent  
423 complexes with REC-dependent ATP hydrolysis and binding, and open circles represent  
424 complexes with REC-dependent ATP hydrolysis only.

425

## 426 **References**

427 Baker, B. S., and A. T. Carpenter. 1972a. "Genetic Analysis of Sex Chromosomal Meiotic Mutants  
428 in *Drosophila Melanogaster*." *Genetics*.

429 ———. 1972b. "Genetic Analysis of Sex Chromosomal Meiotic Mutants in *Drosophila*  
430 *Melanogaster*." *Genetics* 71 (2): 255–86.

431 Beadle, G W. 1932. "A Possible Influence of the Spindle Fibre on Crossing-Over in *Drosophila*."  
432 *Proceedings of the National Academy of Sciences of the United States of America* 18 (2).  
433 United States: 160–65.

434 Bell, Stephen D., and Michael R. Botchan. 2013. "The Minichromosome Maintenance  
435 Replicative Helicase." *Cold Spring Harbor Perspectives in Biology*.  
436 <https://doi.org/10.1101/cshperspect.a012807>.

437 Blanton, Hunter L., Sarah J. Radford, Susan McMahan, Hutton M. Kearney, Joseph G. Ibrahim,  
438 and Jeff Sekelsky. 2005. "REC, *Drosophila* MCM8, Drives Formation of Meiotic Crossovers."  
439 *PLoS Genetics* 1: 343–54. <https://doi.org/10.1371/journal.pgen.0010040>.

440 Brand, Cara L., M. Victoria Cattani, Sarah B. Kingan, Emily L. Landeen, and Daven C. Presgraves.  
441 2018. "Molecular Evolution at a Meiosis Gene Mediates Species Differences in the Rate  
442 and Patterning of Recombination." *Current Biology*.

- 443 <https://doi.org/10.1016/j.cub.2018.02.056>.
- 444 Duffy, Joseph B. 2002. "GAL4 System in Drosophila: A Fly Geneticist's Swiss Army Knife."  
445 *Genesis*. <https://doi.org/10.1002/gene.10150>.
- 446 Ellis, N A, J Groden, T Z Ye, J Straughen, D J Lennon, S Ciocchi, M Proytcheva, and J German. 1995.  
447 "The Bloom's Syndrome Gene Product Is Homologous to RecQ Helicases." *Cell* 83 (4): 655–  
448 66. [https://doi.org/10.1016/0092-8674\(95\)90105-1](https://doi.org/10.1016/0092-8674(95)90105-1).
- 449 Finsterbusch, Friederike, Ramya Ravindranathan, Ihsan Dereli, Marcello Stanzione, Daniel  
450 Tränkner, and Attila Tóth. 2016. "Alignment of Homologous Chromosomes and Effective  
451 Repair of Programmed DNA Double-Strand Breaks during Mouse Meiosis Require the  
452 Minichromosome Maintenance Domain Containing 2 (MCMDC2) Protein." *PLoS Genetics*.  
453 <https://doi.org/10.1371/journal.pgen.1006393>.
- 454 Forsburg, Susan L. 2004. "Eukaryotic MCM Proteins: Beyond Replication Initiation."  
455 *Microbiology and Molecular Biology Reviews : MMBR* 68: 109–31.  
456 <https://doi.org/10.1128/MMBR.68.1.109-131.2004>.
- 457 Gómez, Eliana B., Michael G. Catlett, and Susan L. Forsburg. 2002. "Different Phenotypes in Vivo  
458 Are Associated with ATPase Motif Mutations in Schizosaccharomyces Pombe  
459 Minichromosome Maintenance Proteins." *Genetics*.
- 460 Gray, Stephen, and Paula E. Cohen. 2016. "Control of Meiotic Crossovers: From Double-Strand  
461 Break Formation to Designation." *Annual Review of Genetics*.  
462 <https://doi.org/10.1146/annurev-genet-120215-035111>.
- 463 Grell, R F. 1984. "Time of Recombination in the DROSOPHILA MELANOGASTER Oocyte. III.  
464 Selection and Characterization of Temperature-Sensitive and -Insensitive, Recombination-

- 465 Deficient Alleles in *Drosophila*.” *Genetics* 108 (2). United States: 425–43.
- 466 Hatkevich, Talia, Kathryn P. Kohl, Susan McMahan, Michaelyn A. Hartmann, Andrew M.  
467 Williams, and Jeff Sekelsky. 2017. “Bloom Syndrome Helicase Promotes Meiotic Crossover  
468 Patterning and Homolog Disjunction.” *Current Biology*.  
469 <https://doi.org/10.1016/j.cub.2016.10.055>.
- 470 Hatkevich, Talia, and Jeff Sekelsky. 2017. “Bloom Syndrome Helicase in Meiosis: Pro-Crossover  
471 Functions of an Anti-Crossover Protein.” *BioEssays*.  
472 <https://doi.org/10.1002/bies.201700073>.
- 473 Hollingsworth, Nancy M., and Steven J. Brill. 2004. “The Mus81 Solution to Resolution:  
474 Generating Meiotic Crossovers without Holliday Junctions.” *Genes and Development*.  
475 <https://doi.org/10.1101/gad.1165904>.
- 476 Iyer, Lakshminarayan M., Detlef D. Leipe, Eugene V. Koonin, and L. Aravind. 2004. “Evolutionary  
477 History and Higher Order Classification of AAA+ ATPases.” In *Journal of Structural Biology*.  
478 <https://doi.org/10.1016/j.jsb.2003.10.010>.
- 479 Kohl, Kathryn P, Corbin D Jones, and Jeff Sekelsky. 2012. “Evolution of an MCM Complex in Flies  
480 That Promotes Meiotic Crossovers by Blocking BLM Helicase.” *Science* 338: 1363–65.  
481 <https://doi.org/10.1126/science.1228190>.
- 482 Lake, Cathleen M, and R Scott Hawley. 2012. “The Molecular Control of Meiotic Chromosomal  
483 Behavior: Events in Early Meiotic Prophase in *Drosophila* Oocytes.” *Annual Review of*  
484 *Physiology* 74: 425–51. <https://doi.org/10.1146/annurev-physiol-020911-153342>.
- 485 Lee, Kyung Yong, Jun Sub Im, Etsuko Shibata, Jonghoon Park, Naofumi Handa, Stephen C.  
486 Kowalczykowski, and Anindya Dutta. 2015. “MCM8-9 Complex Promotes Resection of

- 487 Double-Strand Break Ends by MRE11-RAD50-NBS1 Complex.” *Nature Communications*.  
488 <https://doi.org/10.1038/ncomms8744>.
- 489 Liu, H., J. K. Jang, J. Graham, K. Nycz, and K. S. McKim. 2000. “Two Genes Required for Meiotic  
490 Recombination in *Drosophila* Are Expressed from a Dicistronic Message.” *Genetics* 154 (4):  
491 1735–46.
- 492 los Santos, Teresa De, Neil Hunter, Cindy Lee, Brittany Larkin, Josef Loidl, and Nancy M.  
493 Hollingsworth. 2003. “The MUS81/MMS4 Endonuclease Acts Independently of Double-  
494 Holliday Junction Resolution to Promote a Distinct Subset of Crossovers during Meiosis in  
495 Budding Yeast.” *Genetics* 164 (1): 81–94.
- 496 Lutzmann, Malik, Corinne Grey, Sabine Traver, Olivier Ganier, Apolinar Maya-Mendoza, Noemie  
497 Ranisavljevic, Florence Bernex, et al. 2012. “MCM8- and MCM9-Deficient Mice Reveal  
498 Gametogenesis Defects and Genome Instability Due to Impaired Homologous  
499 Recombination.” *Molecular Cell*. <https://doi.org/10.1016/j.molcel.2012.05.048>.
- 500 Maine, Gregory T, and Pratima Sinha. 1984. “Mutants Of,” no. Hand 1978.
- 501 Matsubayashi, Hiroshi, and Masa-Toshi Yamamoto. 2003. “REC, a New Member of the MCM-  
502 Related Protein Family, Is Required for Meiotic Recombination in *Drosophila*.” *Genes &  
503 Genetic Systems*. <https://doi.org/10.1266/ggs.78.363>.
- 504 McKim, K S, J B Dahmus, and R S Hawley. 1996. “Cloning of the *Drosophila Melanogaster*  
505 Meiotic Recombination Gene Mei-218: A Genetic and Molecular Analysis of Interval 15E.”  
506 *Genetics* 144: 215–28.
- 507 McNairn, Adrian J., Vera D. Rinaldi, and John C. Schimenti. 2017. “Repair of Meiotic DNA Breaks  
508 and Homolog Pairing in Mouse Meiosis Requires a Minichromosome Maintenance (MCM)



- 509 Paralog." *Genetics*. <https://doi.org/10.1534/genetics.116.196808>.
- 510 McVey, Mitch, Sabrina L. Andersen, Yuri Broze, and Jeff Sekelsky. 2007. "Multiple Functions of  
511 *Drosophila* BLM Helicase in Maintenance of Genome Stability." *Genetics* 176 (4): 1979–92.  
512 <https://doi.org/10.1534/genetics.106.070052>.
- 513 Miller, Danny E., Clarissa B. Smith, Nazanin Yeganeh Kazemi, Alexandria J. Cockrell, Alexandra V.  
514 Arvanitakis, Justin P. Blumenstiel, Sue L. Jaspersen, and R. Scott Hawley. 2016. "Whole-  
515 Genome Analysis of Individual Meiotic Events in *Drosophila Melanogaster* Reveals That  
516 Noncrossover Gene Conversions Are Insensitive to Interference and the Centromere  
517 Effect." *Genetics*. <https://doi.org/10.1534/genetics.115.186486>.
- 518 Muyt, Arnaud De, Lea Jessop, Elizabeth Kolar, Anuradha Sourirajan, Jianhong Chen, Yaron  
519 Dayani, and Michael Lichten. 2012. "BLM Helicase Ortholog Sgs1 Is a Central Regulator of  
520 Meiotic Recombination Intermediate Metabolism." *Molecular Cell* 46 (1): 43–53.  
521 <https://doi.org/10.1016/j.molcel.2012.02.020>.
- 522 Nishimura, Kohei, Masamichi Ishiai, Kazuki Horikawa, Tatsuo Fukagawa, Minoru Takata,  
523 Haruhiko Takisawa, and Masato T. Kanemaki. 2012. "Mcm8 and Mcm9 Form a Complex  
524 That Functions in Homologous Recombination Repair Induced by DNA Interstrand  
525 Crosslinks." *Molecular Cell*. <https://doi.org/10.1016/j.molcel.2012.05.047>.
- 526 Pochart, Pascale, Dana Woltering, and Nancy M. Hollingsworth. 1997. "Conserved Properties  
527 between Functionally Distinct MutS Homologs in Yeast." *Journal of Biological Chemistry*.  
528 <https://doi.org/10.1074/jbc.272.48.30345>.
- 529 Radford, Sarah J., Elizabeth Goley, Kimberly Baxter, Susan McMahan, and Jeff Sekelsky. 2005.  
530 "Drosophila ERCC1 Is Required for a Subset of MEI-9-Dependent Meiotic Crossovers."

- 531           *Genetics* 170 (4): 1737–45. <https://doi.org/10.1534/genetics.104.036178>.
- 532   Radford, Sarah J., Susan McMahan, Hunter L. Blanton, and Jeff Sekelsky. 2007. “Heteroduplex  
533           DNA in Meiotic Recombination in *Drosophila* Mei-9 Mutants.” *Genetics* 176: 63–72.  
534           <https://doi.org/10.1534/genetics.107.070557>.
- 535   Sekelsky, J. J., K. S. McKim, G. M. Chin, and R. S. Hawley. 1995. “The *Drosophila* Meiotic  
536           Recombination Gene Mei-9 Encodes a Homologue of the Yeast Excision Repair Protein  
537           Rad1.” *Genetics* 141 (2): 619–27.
- 538   Snowden, Timothy, Samir Acharya, Charles Butz, Mark Berardini, and Richard Fishel. 2004.  
539           “HMSH4-HMSH5 Recognizes Holliday Junctions and Forms a Meiosis-Specific Sliding Clamp  
540           That Embraces Homologous Chromosomes.” *Molecular Cell* 15 (3): 437–51.  
541           <https://doi.org/10.1016/j.molcel.2004.06.040>.
- 542   Thurmond, Jim, Joshua L Goodman, Victor B Strelets, Helen Attrill, L Sian Gramates, Steven J  
543           Marygold, Beverley B Matthews, et al. 2018. “FlyBase 2.0: The next Generation.” *Nucleic  
544           Acids Research*. Oxford University Press, 1–7. <https://doi.org/10.1093/nar/gky1003>.
- 545   Walker, J E, M Saraste, M J Runswick, and N J Gay. 1982. “Distantly Related Sequences in the  
546           Alpha- and Beta-Subunits of ATP Synthase, Myosin, Kinases and Other ATP-Requiring  
547           Enzymes and a Common Nucleotide Binding Fold.” *The EMBO Journal* 1: 945–51.  
548           <https://doi.org/6329717>.
- 549   Wiese, Claudia, John M. Hinz, Robert S. Tebbs, Peter B. Nham, Salustra S. Urbin, David W.  
550           Collins, Larry H. Thompson, and David Schild. 2006. “Disparate Requirements for the  
551           Walker A and B ATPase Motifs of Human RAD51D in Homologous Recombination.” *Nucleic  
552           Acids Research*. <https://doi.org/10.1093/nar/gkl366>.

- 553 Wu, Yan, Yujiong He, Ignace A. Moya, Xinguo Qian, and Yu Luo. 2004. "Crystal Structure of  
554 Archaeal Recombinase RadA: A Snapshot of Its Extended Conformation." *Molecular Cell*.  
555 <https://doi.org/10.1016/j.molcel.2004.07.014>.
- 556 Wu, Yan, Xinguo Qian, Yujiong He, Ignace A. Moya, and Yu Luo. 2005. "Crystal Structure of an  
557 ATPase-Active Form of Rad51 Homolog from Methanococcus Voltae: Insights into  
558 Potassium Dependence." *Journal of Biological Chemistry*.  
559 <https://doi.org/10.1074/jbc.M411093200>.
- 560 Yildiz, Özlem, Hutton Kearney, Benjamin C. Kramer, and Jeff J. Sekelsky. 2004. "Mutational  
561 Analysis of the Drosophila DNA Repair and Recombination Gene Mei-9." *Genetics* 167 (1):  
562 263–73. <https://doi.org/10.1534/genetics.167.1.263>.
- 563 Yildiz, Özlem, Samarpan Majumder, Benjamin Kramer, and Jeff J. Sekelsky. 2002. "Drosophila  
564 MUS312 Interacts with the Nucleotide Excision Repair Endonuclease MEI-9 to Generate  
565 Meiotic Crossovers." *Molecular Cell* 10 (6): 1503–9. [https://doi.org/10.1016/S1097-  
566 2765\(02\)00782-7](https://doi.org/10.1016/S1097-2765(02)00782-7).
- 567 Zakharyevich, Kseniya, Shangming Tang, Yunmei Ma, and Neil Hunter. 2012. "Delineation of  
568 Joint Molecule Resolution Pathways in Meiosis Identifies a Crossover-Specific Resolvase."  
569 *Cell* 149 (2): 334–47. <https://doi.org/10.1016/j.cell.2012.03.023>.
- 570 Zalevsky, Jonathan, Amy J. MacQueen, Joseph B. Duffy, Kenneth J. Kemphues, and Anne M.  
571 Villeneuve. 1999. "Crossing over during Caenorhabditis Elegans Meiosis Requires a  
572 Conserved MutS-Based Pathway That Is Partially Dispensable in Budding Yeast." *Genetics*  
573 153 (3): 1271–83.
- 574 Zeng, Yong, Hua Li, Nicole M Schweppe, R Scott Hawley, and William D Gilliland. 2010.

575           “Statistical Analysis of Nondisjunction Assays in *Drosophila*.” *Genetics* 186 (2). United  
576           States: 505–13. <https://doi.org/10.1534/genetics.110.118778>.  
577

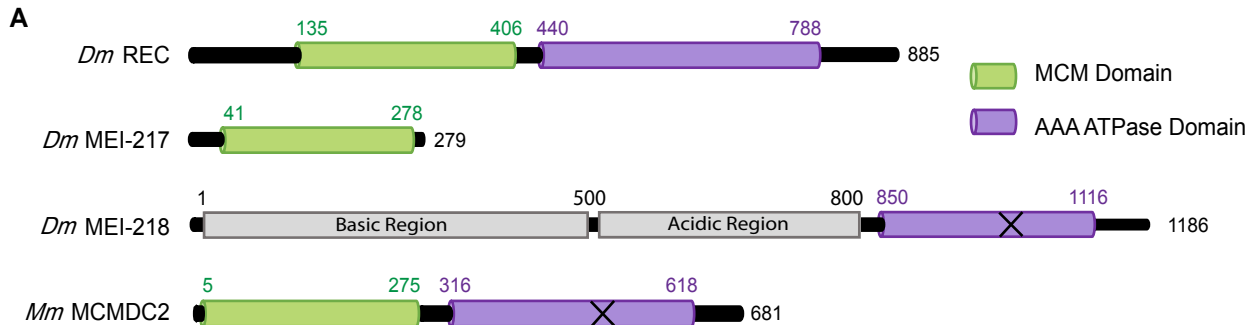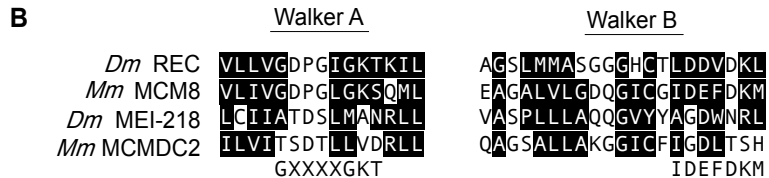

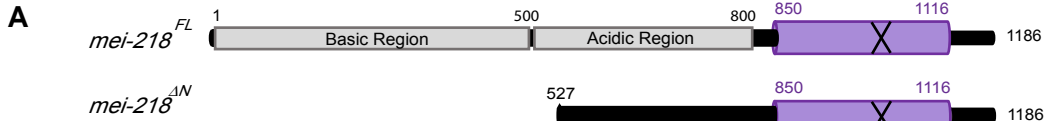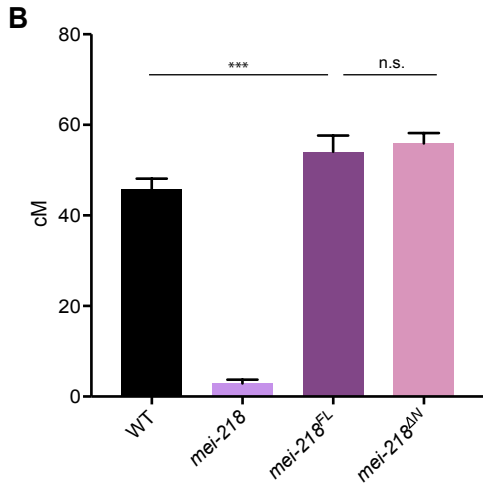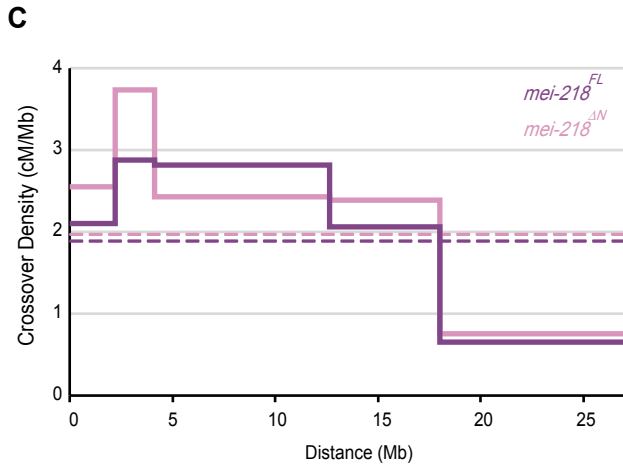

**A**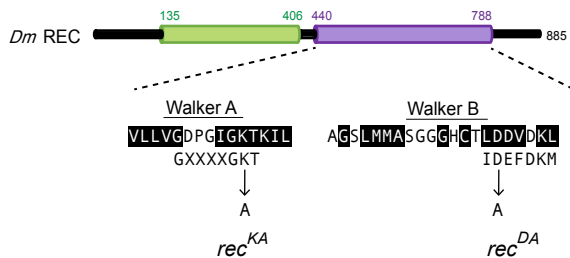**B**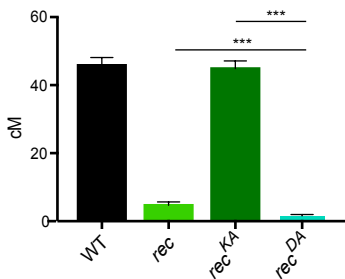**C**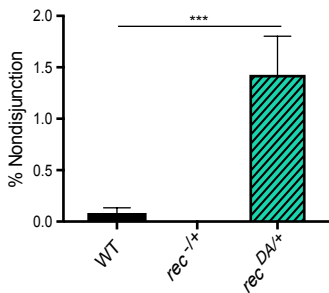**D.**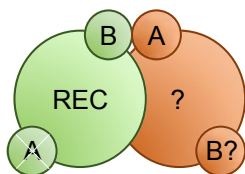

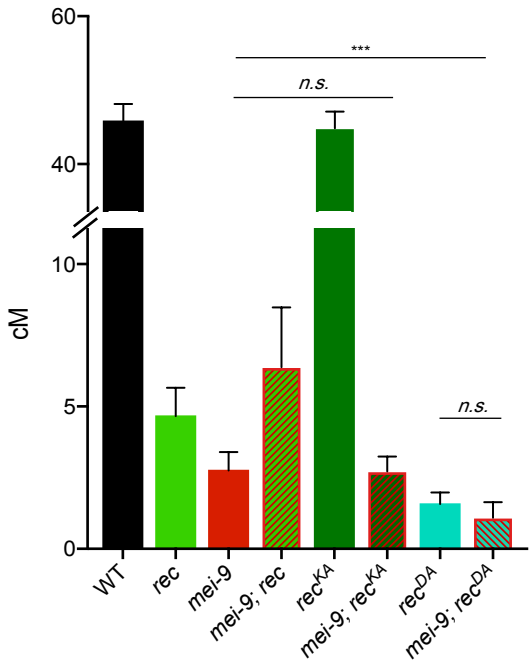



**A**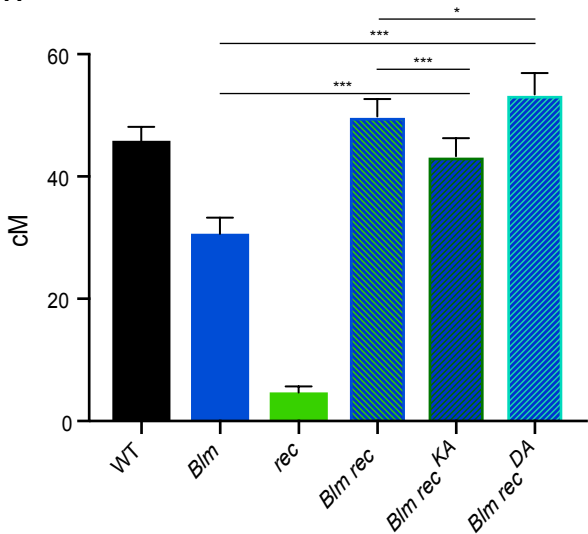**B**

- REC-dependent ATP Binding and Hydrolysis Complex
- REC-dependent ATP Hydrolysis Complex

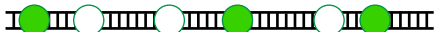

Source: https://www.biorxiv.org/content/10.1101/467134v1.full.pdf
